# Supplementary material
Source: publisher site journal article supplement (https://www.dovepress.com/article/309467)
Supplement: Supplementary file 1 [file get_supplementary_file.php]

**
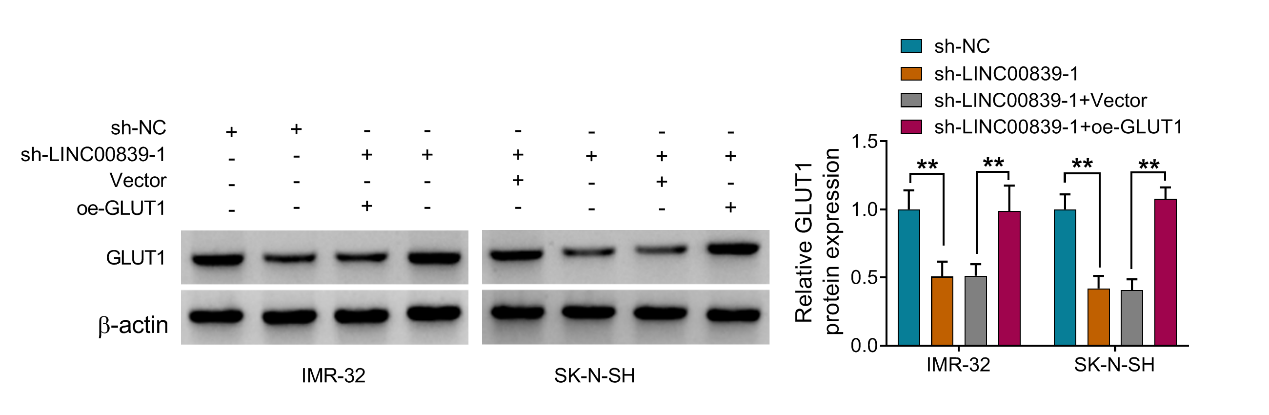
Supplementary Figure 1**

**Supplementary Figure 1 Effects of sh-LINC00839-1 on GLUT1 expression.** IMR-32 and SK-N-SH cells were transfected with sh-NC, sh-LINC00839-1, sh-LINC00839-1 + Vector or oe-GLUT1. The protein expression of GLUT1 was measured via western blot. Difference was analyzed via ANOVA followed via Tukey test. The data were displayed as mean ± SD. ***P*<0.01.

**Supplementary Figure 2**

**
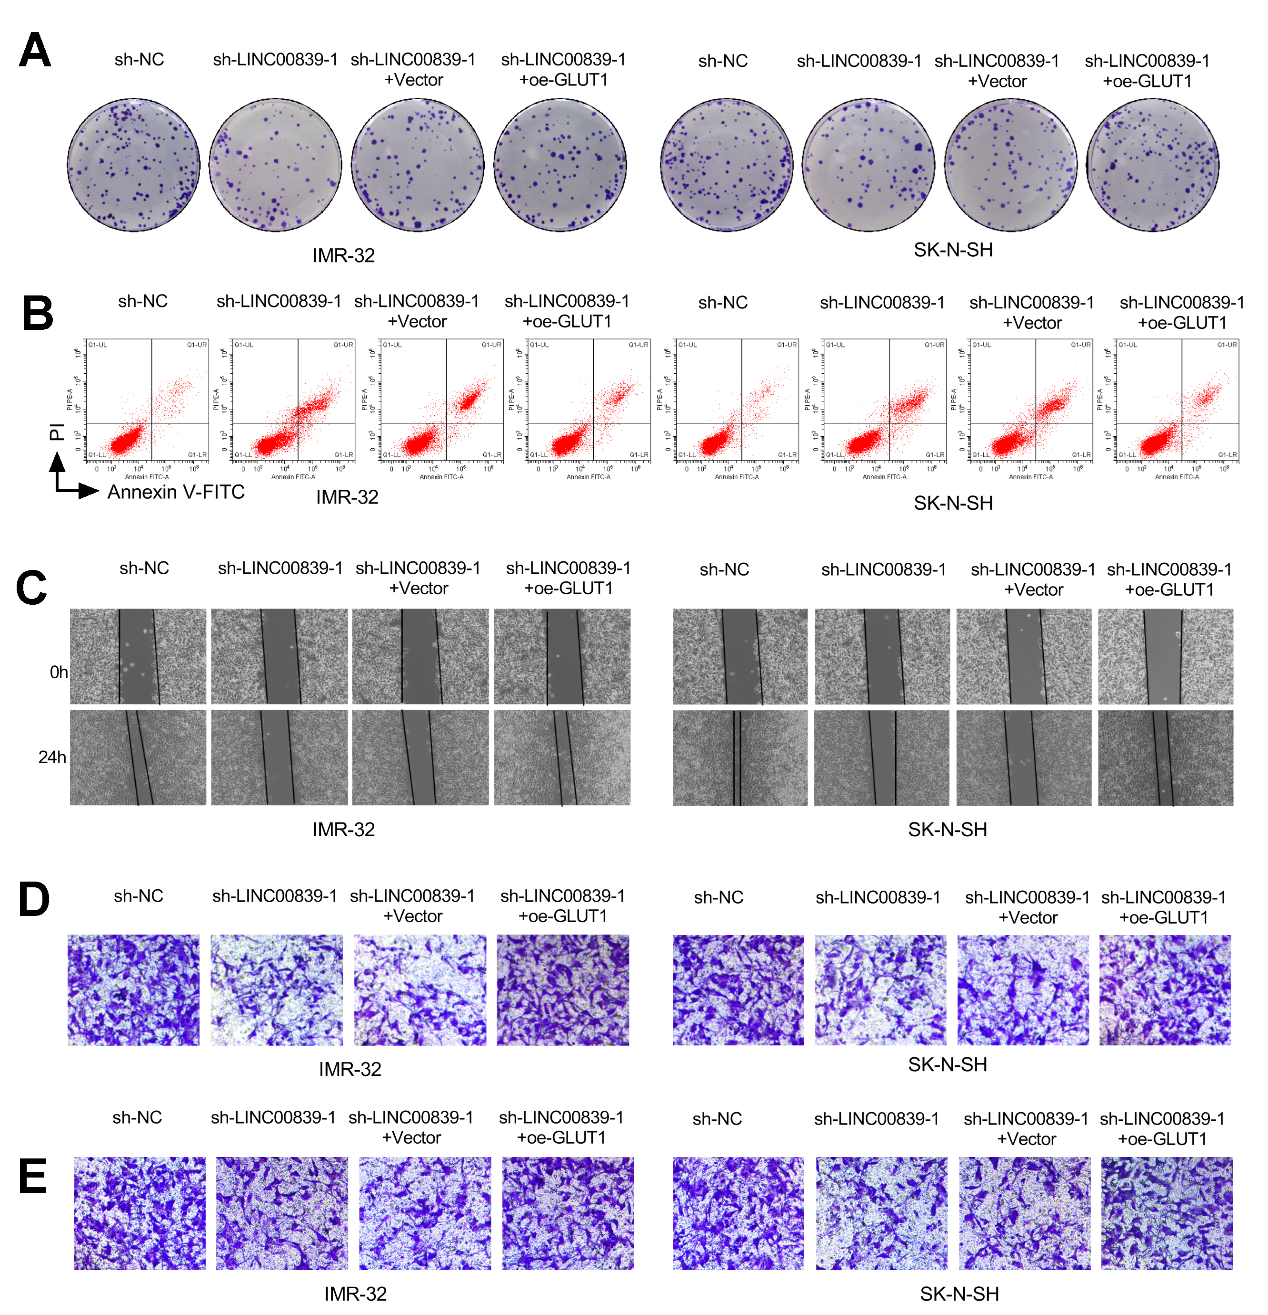
**

**Supplementary Figure 2 The representative picture for Figure 5E-I.** (A) The representative picture for Figure 5E. (B) The representative picture for Figure 5F. (C) The representative picture for Figure 5G. (D) The representative picture for Figure 5H. (E) The representative picture for Figure 5I.

**
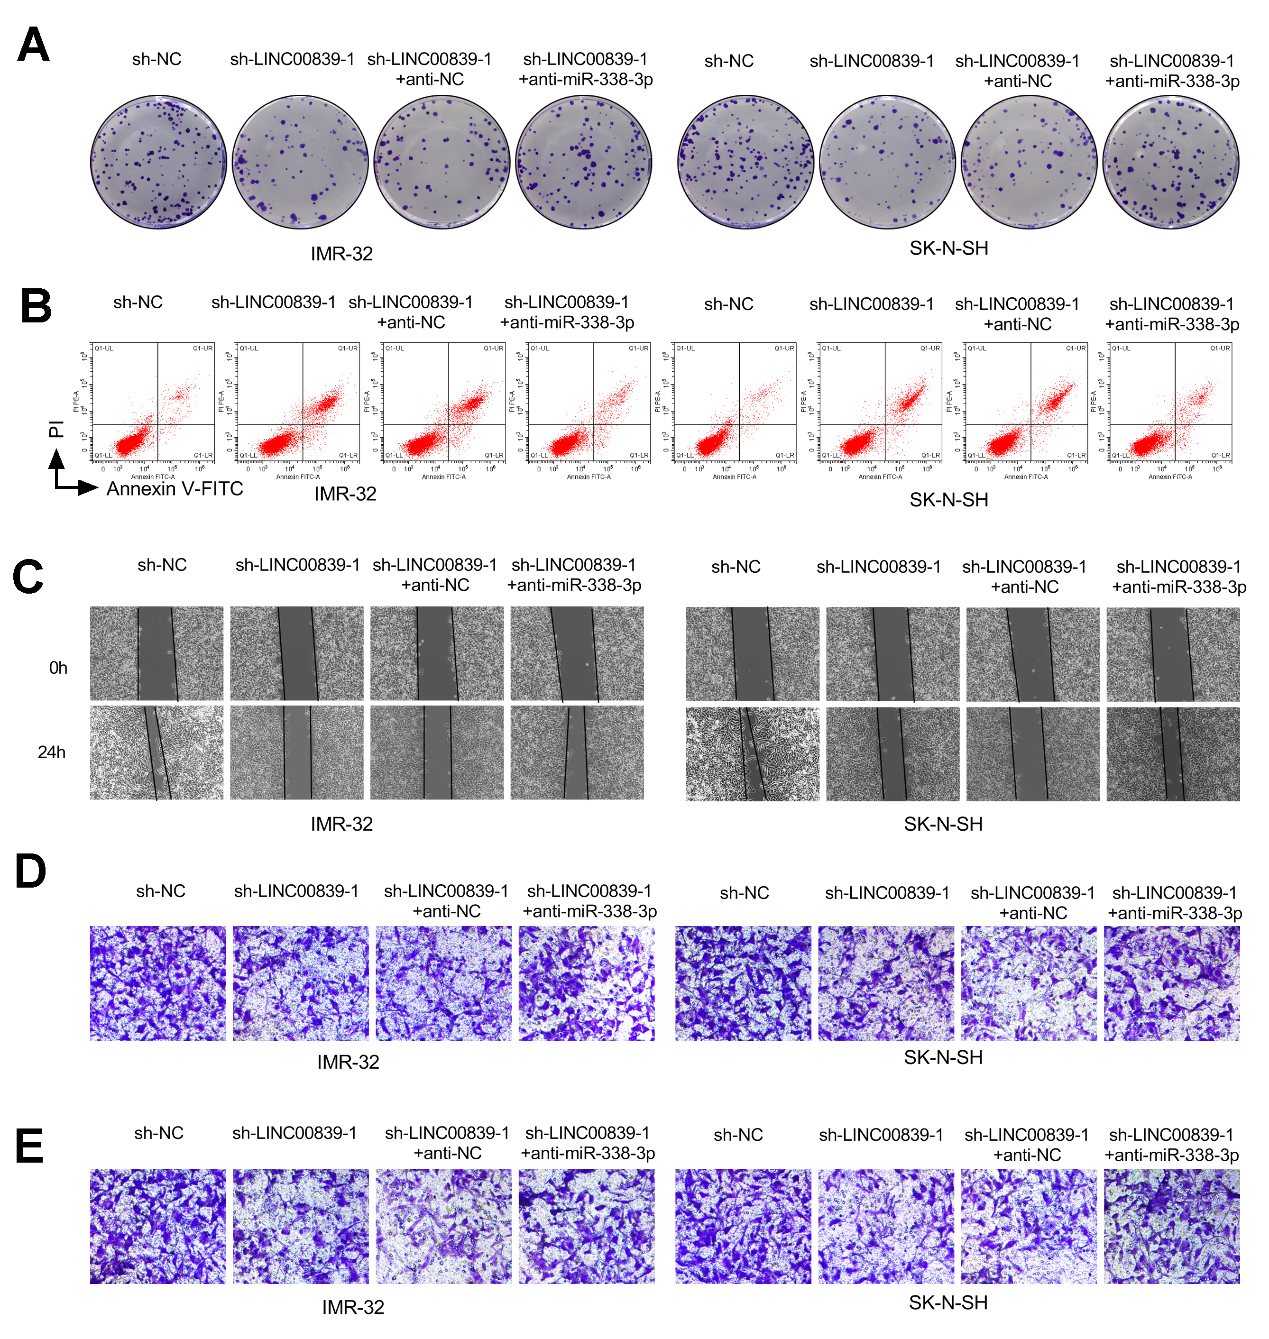
Supplementary Figure 3**

**Supplementary Figure 3 The representative picture for Figure 7C-G.** (A) The representative picture for Figure 7C. (B) The representative picture for Figure 7D. (C) The representative picture for Figure 7E. (D) The representative picture for Figure 7F. (E) The representative picture for Figure 7G.
